# Supplementary material for: Measuring the associations between brain morphometry and polygenic risk scores for substance use disorders in drug-naive adolescents
Source: Research Square preprint supplement (doi:10.21203/rs.3.rs-6190536/v1), 2025-04-01
Supplement: Supplementary file 1 [file 3a544f0ba9099c7a6917ef89.xlsx]

## Sheet: Appendix
S1 Number of twin and non-twin sibling pairs by zygosity and sex
S2 Numbers of Complete and Incomplete Monozygotic (MZ) and Dizygotic (DZ) & Non-Twin Siblings Pairs with MRI Region of Interest and Polygenic Risk Score (PRS) data
S3 Raw and Residualized MRI Region of Interest Descriptive Statistics of European Sample
S4 Mean & Variance Homogeneity (MVH) Comparisons for each Region of Interest (corrected for total intracranial volume)
S5 Mean & Variance Homogeneity (MVH) Comparisons for each Region of Interest (uncorrected for total intracranial volume)
S6 Univariate model fitting comparisons along with standardized variance component attributable to additive genetic (A), shared or common environment (C) & non-shared environmental (E) components of variance for each cortical and subcortical univariate model (corrected for ICV)
S7 Univariate model fitting comparisons along with standardized variance component attributable to additive genetic (A), shared or common environment (C) & non-shared environmental (E) components of variance for each cortical and subcortical univariate model (uncorrected for ICV)
S8CUD multivariate model full fitting comparisons to test the relative contributions of additive genetic (A), common environment (C), and non-shared environmental (E) influences, including both PRSs
S9 CUD multivariate model (uncorrected total cranial volume) full fitting comparisons to test the relative contributions of additive genetic (A), common environment (C), and non-shared environmental (E) influences, including both PRSs
S10 SU/SUD multivariate model full fitting comparisons to test the relative contributions of additive genetic (A), common environment (C), and non-shared environmental (E) influences, including both PRSs
S11 SU/SUD multivariate model (uncorrected for total cranial volume) full fitting comparisons to test the relative contributions of additive genetic (A), common environment (C), and non-shared environmental (E) influences, including both PRSs
S12 Multivariate CUD PRS models fitting comparisons between the best fitting univariate model and competing sub-models
S13 Multivariate CUD PRS models (uncorrected for total cranial volume) fitting comparisons between the best fitting univariate model and competing sub-models
S14 Multivariate SU/SUD PRS models fitting comparisons between the best fitting univariate model and competing sub-models
S15 Multivariate SU/SUD PRS models (uncorrected for total cranial volume) fitting comparisons between the best fitting univariate model and competing sub-models
S16 Phenotypic Twin Polypairwise Correlations of CUD, SU/SUD PRS and ROI's
S17 Full Information Maximum Likelihood Correlations with Subcortical Regions and Subcortical PRSs
S18 Full Information Maximum Likelihood Correlations with Cortical Regions and Cortical PRSs
S19 Full Information Maximum Likelihood Correlations Subcortical Regions and SU/SUD & CUD PRS
S20 Full Information Maximum Likelihood Correlations Cortical Regions and SU/SUD & CUD PRS

## Sheet: S1
S1 Number of sibling pairs by zygosity and sex.
Relationship	Pairs
Monozygotic Female	104
Monozygotic Male	118
Dizygotic Female	136
Dizygotic Male	158
Dizygotic Opposite Sex	34
Non-Twin Sibling Female	89
Non-Twin Sibling Male	103
Non-Twin Sibling Opposite Sex	195

## Sheet: S2
S2 Numbers of Complete and Incomplete Monozygotic (MZ) and Dizygotic (DZ) & Non-Twin Siblings Pairs with MRI Region of Interest and Polygenic Risk Score (PRS) data
		MZ	MZ	DZ	DZ	Sib pair	Sib pair
		Complete	Incomplete	Complete	Incomplete	Complete	Incomplete
Nucleus Accumbens		222	0	328	0	387	0
Amygdala		222	0	328	0	387	0
Caudate (mm^3)		222	0	328	0	387	0
Hippocampus (mm^3)		222	0	328	0	387	0
Putamen (mm^3)		222	0	328	0	387	0
Thalamus (mm^3)		222	0	328	0	387	0
Cortical Surface Area (mm^2)		221	1	385	2	385	2
Cortical Thickness (mm^2)		221	1	328	0	385	2
CUD PRS		222	0	328	0	387	0
SU/SUD PRS		222	0	328	0	387	0
Nucleus Accumbens PRS		222	0	328	0	387	0
Amygdala PRS		222	0	328	0	387	0
Caudate PRS		222	0	328	0	387	0
Hippocampus PRS		222	0	328	0	387	0
Putamen PRS		222	0	328	0	387	0
Thalamus PRS		222	0	328	0	387	0
Cortical Surface Area PRS		222	0	328	0	387	0
Cortical Thickness PRS		222	0	328	0	387	0
Note: All twins had complete data on all ten PRSs

## Sheet: S3
S3 Raw and Residualized MRI Region of Interest Descriptive Statistics of European Sample
Variable	Mean (Raw)	SD (Raw)	Mean (Residualized)	SD (Residualized)
Nucleus Accumbens (mm^3)	612.099	96.5223	0.0257177	81.9993
Amygdala (mm^3)	1833.92	214.426	0.0616105	163.393
Caudate (mm^3)	4023.33	451.3	0.596766	387.738
Hippocampus (mm^3)	4216.7	384.822	-6.80515e-10	11120.1
Putamen (mm^3)	5434.23	553.214	7.127e-16	0.0800891
Thalamus (mm^3)	7780.91	728.902	0.148281	291.547
Cortical Surface Area (mm^2)	193450	17503.4	0.556548	455.427
Cortical Thickness (mm^2)	2.71685	0.0810953	0.176364	488.056

## Sheet: S4
S4 Mean & Variance Homogenetiy (MVH) Comparisons for each MRI Region of Interest (corrected for total intracranial volume)
Structure	Model	ep	-2LL	df	Δ2LL	Δdf	p	AIC
Cortical Surface Area	Null	15	4775.89	1856	--	--	--	4805.89
Cortical Surface Area	Full Mean Variance	5	4790.11	1866	14.23	10	0.16	4800.11
Cortical Surface Area	Constrained DZ-Sib Covariance	4	4815.48	1867	39.6	11	0	4823.48
Cortical Thickness	Null	15	5032.06	1856	--	--	--	5062.06
Cortical Thickness	Full Mean Variance	5	5034.21	1866	2.15	10	1	5044.21
Cortical Thickness	Constrained DZ-Sib Covariance	4	5034.26	1867	2.2	11	1	5042.26
Nucleus Accumbens	Null	15	5058.47	1859	--	--	--	5088.47
Nucleus Accumbens	Full Mean Variance	5	5062.66	1869	4.19	10	0.94	5072.66
Nucleus Accumbens	Constrained DZ-Sib Covariance	4	5063.47	1870	5	11	0.93	5071.47
Hippocampus	Null	15	5000.43	1859	--	--	--	5030.43
Hippocampus	Full Mean Variance	5	5002.57	1869	2.15	10	1	5012.57
Hippocampus	Constrained DZ-Sib Covariance	4	5002.59	1870	2.16	11	1	5010.59
Nucleus Accumbens	Null	15	5058.47	1859	--	--	--	5088.47
Nucleus Accumbens	Full Mean Variance	5	5062.66	1869	4.19	10	0.94	5072.66
Nucleus Accumbens	Constrained DZ-Sib Covariance	4	5063.47	1870	5	11	0.93	5071.47
Putamen	Null	15	4744.6	1859	--	--	--	4774.6
Putamen	Full Mean Variance	5	4758.35	1869	13.75	10	0.18	4768.35
Putamen	Constrained DZ-Sib Covariance	4	4759.12	1870	14.52	11	0.21	4767.12
Caudate	Null	15	4863.77	1859	--	--	--	4893.77
Caudate	Full Mean Variance	5	4866.14	1869	2.36	10	0.99	4876.14
Caudate	Constrained DZ-Sib Covariance	4	4866.66	1870	2.89	11	0.99	4874.66
Thalamus	Null	15	4995.95	1859	--	--	--	5025.95
Thalamus	Full Mean Variance	5	4999.49	1869	3.55	10	0.97	5009.49
Thalamus	Constrained DZ-Sib Covariance	4	5003	1870	7.05	11	0.79	5011
Amygdala	Null	15	5027.28	1859	--	--	--	5057.28
Amygdala	Full Mean Variance	5	5040.99	1869	13.7	10	0.19	5050.99
Amygdala	Constrained DZ-Sib Covariance	4	5045.9	1870	18.62	11	0.07	5053.90
Each region of interest residualized for the effects of total intracranial volume. Table S1.1 presents all mean and variance parameter estimates for the fully saturated and the constrained homogeneity models. All subsequent analyses proceeded under the assumption of mean & variance homogeneity for each region of interest (ROI). Note: ep = number of estimated parameters, -2LL = -2 x log-likelihood…

## Sheet: S5
S5 Mean & Variance Homogenetiy (MVH) Comparisons for each MRI Region of Interest (uncorrected for total intracranial volume)
Structure	Model	ep	-2LL	df	Δ2LL	Δdf	p	AIC
Cortical Surface Area	Null	15	4689.62	1856	--	--	--	4719.62
Cortical Surface Area	Full Mean Variance	5	4706.49	1866	16.87	10	0.08	4716.49
Cortical Surface Area	Constrained DZ-Sib Covariance	4	4708.37	1867	18.75	11	0.07	4716.37
Cortical Thickness	Null	15	5022.27	1856	--	--	--	5052.27
Cortical Thickness	Full Mean Variance	5	5024.91	1866	2.64	10	0.99	5034.91
Cortical Thickness	Constrained DZ-Sib Covariance	4	5025.08	1867	2.81	11	0.99	5033.08
Nucleus Accumbens	Null	15	4996.25	1859	--	--	--	5026.25
Nucleus Accumbens	Full Mean Variance	5	5000.29	1869	4.05	10	0.95	5010.29
Nucleus Accumbens	Constrained DZ-Sib Covariance	4	5000.46	1870	4.22	11	0.96	5008.46
Hippocampus	Null	15	4878.46	1859	--	--	--	4908.46
Hippocampus	Full Mean Variance	5	4879.36	1869	0.9	10	1	4889.36
Hippocampus	Constrained DZ-Sib Covariance	4	4879.63	1870	1.18	11	1	4887.63
Putamen	Null	15	4697.04	1859	--	--	--	4727.04
Putamen	Full Mean Variance	5	4710.8	1869	13.76	10	0.18	4720.8
Putamen	Constrained DZ-Sib Covariance	4	4711.26	1870	14.22	11	0.22	4719.26
Caudate	Null	15	4807.35	1859	--	--	--	4837.35
Caudate	Full Mean Variance	5	4809.71	1869	2.36	10	0.99	4819.71
Caudate	Constrained DZ-Sib Covariance	4	4809.76	1870	2.41	11	1	4817.76
Thalamus	Null	15	4807.58	1859	--	--	--	4837.58
Thalamus	Full Mean Variance	5	4813.28	1869	5.7	10	0.84	4823.28
Thalamus	Constrained DZ-Sib Covariance	4	4819.66	1870	12.09	11	0.36	4827.66
Amygdala	Null	15	5020.07	1859	--	--	--	5050.07
Amygdala	Full Mean Variance	5	5034.15	1869	14.07	10	0.17	5044.15
Amygdala	Constrained DZ-Sib Covariance	4	5039.74	1870	19.66	11	0.05	5047.74
The assumption of mean and variance homogeneity for each ROI using the unresidualized data. Table S1.2 presents all mean & variance parameter estimates for the fully saturated and the constrained homogeneity models. All subsequent analyses proceeded under the assumption of mean variance homogeneity for each region of interest (ROI). Note: ep = number of estimated parameters, -2LL = -2 x log-likel…

## Sheet: S6
S6 Univariate model fitting comparisons along with standardized variance component attributable to additive genetic (A), shared or common environment (C) & non-shared environmental (E) components of variance for each cortical and subcortical univariate model (corrected for total intracranial volume).
Structure	ep	-2LL	df	Δ-2LL	Δdf	p	AIC	A (95%CIs)	C (95%CIs)	E (95%CIs)
Cortical Thickness
ACE	4	4749.76	1751	--	--	--	4757.76	0.43 (0.26, 0.59)	0.19 (0.06, 0.31)	0.38 (0.32,0.46)
AE	3	4758.82	1752	9.06	1	0.0026	4764.82	0.65 (0.59, 0.71)	0.00 (0.00, 0.00)	0.35 (0.29,0.41)
CE	3	4770.54	1752	20.78	1	0	4776.54	0.00 (0.00, 0.00)	0.46 (0.41, 0.51)	0.54 (0.49,0.59)
E	2	4978.68	1753	228.92	2	0	4982.68	0.00 (0.00, 0.00)	0.00 (0.00, 0.00)	1.00 (1.00,1.00)
Cortical Surface Area
ACE	4	4632.03	1751	--	--	--	4640.03	0.64 (0.49, 0.78)	0.10 (-0.01, 0.21)	0.26 (0.21, 0.32)
AE	3	4635.12	1752	3.09	1	0.0787	4641.12	0.75 (0.70, 0.80)	0.00 (0.00, 0.00)	0.25 (0.20, 0.30)
CE	3	4686.52	1752	54.49	1	0	4692.52	0.00 (0.00, 0.00)	0.51 (0.46, 0.56)	0.49 (0.44, 0.54)
E	2	4949.75	1753	317.73	2	0	4953.75	0.00 (0.00, 0.00)	0.00 (0.00, 0.00)	1.00 (1.00, 1.00)
Nucleus Accumbens
ACE	4	4743.69	1752	--	--	--	4751.69	0.44 (0.27, 0.60)	0.18 (0.06, 0.31)	0.38 (0.31, 0.45)
AE	3	4752.23	1753	8.54	1	0.0035	4758.23	0.66 (0.59, 0.71)	0.00 (0.00, 0.00)	0.34 (0.29, 0.41)
CE	3	4766.02	1753	22.32	1	0	4772.02	0.00 (0.00, 0.00)	0.46 (0.41, 0.52)	0.54 (0.48, 0.59)
E	2	4979.78	1754	236.08	2	0	4983.78	0.00 (0.00, 0.00)	0.00 (0.00, 0.00)	1.00 (1.00, 1.00)
Hippocampus
ACE	4	4727.34	1752	--	--	--	4735.34	0.49 (0.32, 0.64)	0.18 (0.06, 0.30)	0.33 (0.27, 0.41)
AE	3	4736.45	1753	9.10	1	0.0026	4742.45	0.70 (0.64, 0.75)	0.00 (0.00, 0.00)	0.30 (0.25, 0.36)
CE	3	4755.52	1753	28.18	1	0	4761.52	0.00 (0.00, 0.00)	0.48 (0.43, 0.53)	0.52 (0.47, 0.57)
E	2	4990.37	1754	263.03	2	0	4994.37	0.00 (0.00, 0.00)	0.00 (0.00, 0.00)	1.00 (1.00, 1.00)
Putamen
ACE	4	4562.28	1752	--	--	--	4570.28	0.83 (0.71, 0.93)	0.05 (0.04, 0.14)	0.13 (0.09, 0.17)
AE	3	4563.29	1753	1.01	1	0.316	4569.29	0.88 (0.83, 0.91)	0.00 (0.00, 0.00)	0.12 (0.09, 0.17)
CE	3	4662.76	1753	100.48	1	0	4668.76	0.00 (0.00, 0.00)	0.54 (0.50, 0.59)	0.46 (0.41, 0.50)
E	2	4971.79	1754	409.50	2	0	4975.79	0.00 (0.00, 0.00)	0.00 (0.00, 0.00)	1.00 (1.00, 1.00)
Thalamus
ACE	4	4663.1	1752	--	--	--	4671.1	0.50 (0.34, 0.64)	0.20 (0.08, 0.31)	0.30 (0.25, 0.37)
AE	3	4674.41	1753	11.31	1	0.0008	4680.41	0.73 (0.67, 0.77)	0.00 (0.00, 0.00)	0.27 (0.23, 0.33)
CE	3	4695.19	1753	32.09	1	0	4701.19	0.00 (0.00, 0.00)	0.52 (0.47, 0.56)	0.48 (0.44, 0.53)
E	2	4969.18	1754	306.08	2	0	4973.18	0.00 (0.00, 0.00)	0.00 (0.00, 0.00)	1.00 (1.00, 1.00)
Caudate
ACE	4	4611.29	1752	--	--	--	4619.29	0.58 (0.44, 0.71)	0.21 (0.10, 0.31)	0.21 (0.17, 0.27)
AE	3	4626.58	1753	15.29	1	0.0001	4632.58	0.81 (0.77, 0.85)	0.00 (0.00, 0.00)	0.19 (0.15, 0.23)
CE	3	4659.98	1753	48.70	1	0	4665.98	0.00 (0.00, 0.00)	0.57 (0.52, 0.61)	0.43 (0.39, 0.48)
E	2	5002.16	1754	390.88	2	0	5006.16	0.00 (0.00, 0.00)	0.00 (0.00, 0.00)	1.00 (1.00, 1.00)
Amygdala
ACE	4	4846.03	1752	--	--	--	4854.03	0.37 (0.19, 0.55)	0.19 (0.07, 0.32)	0.44 (0.36, 0.52)
AE	3	4855.45	1753	9.42	1	0.0021	4861.45	0.61 (0.54, 0.68)	0.00 (0.00, 0.00)	0.39 (0.32, 0.46)
CE	3	4859.79	1753	13.76	1	0.0002	4865.79	0.00 (0.00, 0.00)	0.42 (0.36, 0.47)	0.58 (0.53, 0.64)
E	2	5027.73	1754	181.71	2	0	5031.73	0.00 (0.00, 0.00)	0.00 (0.00, 0.00)	1.00 (1.00, 1.00)
Note: ep = number of estimated parameters, -2LL = -2 x log-likelihood, Δ-2LL = change in -2 x log-likelihood, Δdf = change in degrees of freedom, AIC = Akaike Information Criteria

## Sheet: S7
S7 Univariate model fitting comparisons along with standardized variance component attributable to additive genetic (A), shared or common environment (C) & non-shared environmental (E) components of variance for each cortical and subcortical univariate model (uncorrected for total intracranial volume).
Structure	ep	-2LL	df	Δ-2LL	Δdf	p	AIC	A (95%CIs)	C (95%CIs)	E (95%CIs)
Cortical Thickness
ACE	4	4747.44	1751	--	--	--	4755.44	0.43 (0.26, 0.59)	0.19 (0.07, 0.31)	0.38 (0.31, 0.46)
AE	3	4756.94	1752	9.5	1	0.0021	4762.94	0.66 (0.59, 0.71)	0.00 (0.00, 0.00)	0.34 (0.29, 0.41)
CE	3	4768.33	1752	20.89	1	0	4774.33	0.00 (0.00, 0.00)	0.46 (0.41, 0.51)	0.54 (0.49, 0.59)
E	2	4979.55	1753	232.11	2	0	4983.55	0.00 (0.00, 0.00)	0.00 (0.00, 0.00)	1.00 (1.00, 1.00)
Cortical Surface Area
ACE	4	4467.8	1751	--	--	--	4475.8	0.78 (0.66, 0.89)	0.09 (0.01, 0.19)	0.13 (0.10, 0.17)
AE	3	4471.08	1752	3.28	1	0.07	4477.08	0.87 (0.84, 0.90)	0.00 (0.00, 0.00)	0.13 (0.10, 0.16)
CE	3	4572.76	1752	104.96	1	0	4578.76	0.00 (0.00, 0.00)	0.59 (0.54, 0.63)	0.41 (0.37, 0.46)
E	2	4942.72	1753	474.92	2	0	4946.72	0.00 (0.00, 0.00)	0.00 (0.00, 0.00)	1.00 (1.00, 1.00)
Nucleus Accumbens
ACE	4	4677.98	1752	--	--	--	4685.98	0.54 (0.38, 0.69)	0.14 (0.02, 0.26)	0.32 (0.26, 0.39)
AE	3	4683.5	1753	5.52	1	0.0188	4689.5	0.70 (0.65, 0.75)	0.00 (0.00, 0.00)	0.30 (0.25, 0.35)
CE	3	4714.61	1753	36.63	1	0	4720.61	0.00 (0.00, 0.00)	0.49 (0.44, 0.54)	0.51 (0.46, 0.56)
E	2	4956.27	1754	278.3	2	0	4960.27	0.00 (0.00, 0.00)	0.00 (0.00, 0.00)	1.00 (1.00, 1.00)
Hippocampus
ACE	4	4652.29	1752	--	--	--	4660.29	0.67 (0.52, 0.80)	0.11 (0.01, 0.22)	0.22 (0.17, 0.29)
AE	3	4656.56	1753	4.27	1	0.0387	4662.56	0.79 (0.74, 0.84)	0.00 (0.00, 0.00)	0.21 (0.16, 0.26)
CE	3	4710.58	1753	58.29	1	0	4716.58	0.00 (0.00, 0.00)	0.52 (0.47, 0.57)	0.48 (0.43, 0.53)
E	2	4985.43	1754	333.14	2	0	4989.43	0.00 (0.00, 0.00)	0.00 (0.00, 0.00)	1.00 (1.00, 1.00)
Putamen
ACE	4	4522.68	1752	--	--	--	4530.68	0.88 (0.77, 0.97)	0.03 (0.05, 0.12)	0.09 (0.07, 0.12)
AE	3	4523.27	1753	0.6	1	0.4405	4529.27	0.91(0.88, 0.93)	0.00 (0.00, 0.00)	0.09 (0.07, 0.12)
CE	3	4648.8	1753	126.12	1	0	4654.8	0.00 (0.00, 0.00)	0.56 (0.51, 0.60)	0.44 (0.40, 0.49)
E	2	4980.37	1754	457.69	2	0	4984.37	0.00 (0.00, 0.00)	0.00 (0.00, 0.00)	1.00 (1.00, 1.00)
Thalamus
ACE	4	4442.75	1752	--	--	--	4450.75	0.56 (0.44, 0.68)	0.26 (0.15, 0.36)	0.18 (0.14, 0.23)
AE	3	4466.37	1753	23.62	1	0	4472.37	0.84 (0.80, 0.87)	0.00 (0.00, 0.00)	0.16 (0.13, 0.20)
CE	3	4500.94	1753	58.19	1	0	4506.94	0.00 (0.00, 0.00)	0.63 (0.59, 0.67)	0.37 (0.33, 0.41)
E	2	4945.34	1754	502.6	2	0	4949.34	0.00 (0.00, 0.00)	0.00 (0.00, 0.00)	1.00 (1.00, 1.00)
Caudate
ACE	4	4562.75	1752	--	--	--	4570.75	0.68 (0.55, 0.80)	0.14 (0.04, 0.25)	0.18 (0.14, 0.23)
AE	3	4570.8	1753	8.05	1	0.0045	4576.8	0.84 (0.79, 0.87)	0.00 (0.00, 0.00)	0.16 (0.13, 0.21)
CE	3	4632.23	1753	69.48	1	0	4638.23	0.00 (0.00, 0.00)	0.57 (0.52, 0.61)	0.43 (0.39, 0.48)
E	2	4976.12	1754	413.37	2	0	4980.12	0.00 (0.00, 0.00)	0.00 (0.00, 0.00)	1.00 (1.00, 1.00)
Amygdala
ACE	4	4844.18	1752	--	--	--	4852.18	0.37 (0.18, 0.54)	0.20 (0.07, 0.32)	1.00 (1.00, 1.00)
AE	3	4854.23	1753	10.05	1	0.0015	4860.23	0.62 (0.54, 0.68)	0.00 (0.00, 0.00)	0.38 (0.32, 0.46)
CE	3	4857.72	1753	13.54	1	0.0002	4863.72	0.00 (0.00, 0.00)	0.42 (0.37, 0.47)	0.58 (0.53, 0.63)
E	2	5029.03	1754	184.86	2	0	5033.03	0.00 (0.00, 0.00)	0.00 (0.00, 0.00)	1.00 (1.00, 1.00)
Note: ep = number of estimated parameters, -2LL = -2 x log-likelihood, Δ-2LL = change in -2 x log-likelihood, Δdf = change in degrees of freedom, AIC = Akaike Information Criteria

## Sheet: S8
S8 CUD multivariate model full fitting comparisons to test the relative contributions of additive genetic (A), common environment (C), and non-shared environmental (E) influences, including both PRSs
Structure		ep	-2LL	df	Δ-2LL	Δdf	p	AIC
Cortical Surface Area
	ACE+β21+β31	10	13619.7	5165	--	--	--	13639.7
	AE+β21+β31	9	13640.2	5166	20.5247	1	5.88678e-06	13658.2
	CE+β21+β31	9	13681.9	5166	62.2404	1	3.03984e-15	13699.9
	E+β21+β31	8	14113	5167	493.283	2	7.67367e-108	14129
Cortical Thickness
	ACE+β21+β31	10	13886.5	5165	--	--	--	13906.5
	AE+β21+β31	9	13887.1	5166	0.548592	1	0.458894	13905.1
	CE+β21+β31	9	13932.5	5166	45.9582	1	1.20805e-11	13950.5
	E+β21+β31	8	14152	5167	265.459	2	2.27171e-58	14168
Hippocampus
	ACE+β21+β31	10	13910.3	5168	--	--	--	13930.3
	AE+β21+β31	9	13910.4	5169	0.0468195	1	0.828693	13928.4
	CE+β21+β31	9	13980.3	5169	70.0024	1	5.92315e-17	13998.3
	E+β21+β31	8	14223.9	5170	313.549	2	8.1967e-69	14239.9
Nuclues Accumbens
	ACE+β21+β31	10	13973.4	5168	--	--	--	13993.4
	AE+β21+β31	9	13973.5	5169	0.0345054	1	0.852636	13991.5
	CE+β21+β31	9	14026	5169	52.5307	1	4.23567e-13	14044
	E+β21+β31	8	14222	5170	248.539	2	1.07261e-54	14238
Caudate
	ACE+β21+β31	10	13710.7	5168	--	--	--	13730.7
	AE+β21+β31	9	13711.4	5169	0.651341	1	0.419634	13729.4
	CE+β21+β31	9	13824.5	5169	113.793	1	1.44614e-26	13842.5
	E+β21+β31	8	14146.3	5170	435.617	2	2.5525e-95	14162.3
Thalamus
	ACE+β21+β31	10	13917.6	5168	--	--	--	13937.6
	AE+β21+β31	9	13918.1	5169	0.515451	1	0.472789	13936.1
	CE+β21+β31	9	13997.6	5169	80.0903	1	3.57691e-19	14015.6
	E+β21+β31	8	14220.4	5170	302.862	2	1.71524e-66	14236.4
Amygdala
	ACE+β21+β31	10	13975.5	5168	--	--	--	13995.5
	AE+β21+β31	9	13976.5	5169	1.01646	1	0.31336	13994.5
	CE+β21+β31	9	14020	5169	44.4431	1	2.61863e-11	14038
	E+β21+β31	8	14243.1	5170	267.588	2	7.83449e-59	14259.1
Putamen
	ACE+β21+β31	10	13567.4	5168	--	--	--	13587.4
	AE+β21+β31	9	13567.5	5169	0.0204409	1	0.886313	13585.5
	CE+β21+β31	9	13765.3	5169	197.837	1	6.19192e-45	13783.3
	E+β21+β31	8	14116.8	5170	549.369	2	5.08324e-120	14132.8
Note: ep = number of estimated parameters, -2LL = -2 x log-likelihood, Δ-2LL = change in -2 x log-likelihood, Δdf = change in degrees of freedom, AIC = Akaike Information Criteria, β21=ROI PRS, β31= CUD PRS

## Sheet: S9
S9 CUD multivariate model (uncorrected total intracranial volume) full fitting comparisons to test the relative contributions of additive genetic (A), common environment (C), and non-shared environmental (E) influences, including both PRSs
Structure		ep	-2LL	df	Δ-2LL	Δdf	p	AIC
Cortical Surface Area
	ACE+β21+β31	10	13585.6	5165	--	--	--	13605.6
	AE+β21+β31	9	13591	5166	5.47159	1	0.019328	13609
	CE+β21+β31	9	13743.3	5166	157.698	1	3.60304e-36	13761.3
	E+β21+β31	8	14180.1	5167	594.502	2	8.04687e-130	14196.1
Cortical Thickness
	ACE+β21+β31	10	13870.5	5165	--	--	--	13890.5
	AE+β21+β31	9	13871.2	5166	0.742871	1	0.388743	13889.2
	CE+β21+β31	9	13917.9	5166	47.3956	1	5.80128e-12	13935.9
	E+β21+β31	8	14145.5	5167	275.045	2	1.88291e-60	14161.5
Hippocampus
	ACE+β21+β31	10	13768.7	5168	--	--	--	13788.7
	AE+β21+β31	9	13768.7	5169	0.00878652	1	0.925319	13786.7
	CE+β21+β31	9	13899	5169	130.275	1	3.56772e-30	13917
	E+β21+β31	8	14210.8	5170	442.026	2	1.0358e-96	14226.8
Nuclues Accumbens
	ACE+β21+β31	10	13888.8	5168	--	--	--	13908.8
	AE+β21+β31	9	13888.8	5169	0.0076006	1	0.930527	13906.8
	CE+β21+β31	9	13961.1	5169	72.2743	1	1.87269e-17	13979.1
	E+β21+β31	8	14200.6	5170	311.819	2	1.94744e-68	14216.6
Caudate
	ACE+β21+β31	10	13638.5	5168	--	--	--	13658.5
	AE+β21+β31	9	13640.1	5169	1.66088	1	0.197485	13658.1
	CE+β21+β31	9	13771.4	5169	132.883	1	9.5893e-31	13789.4
	E+β21+β31	8	14136.8	5170	498.278	2	6.31414e-109	14152.8
Thalamus
	ACE+β21+β31	10	13715.1	5168	--	--	--	13735.1
	AE+β21+β31	9	13718.4	5169	3.32733	1	0.0681372	13736.4
	CE+β21+β31	9	13830.8	5169	115.693	1	5.54861e-27	13848.8
	E+β21+β31	8	14207.6	5170	492.575	2	1.09338e-107	14223.6
Amygdala
	ACE+β21+β31	10	13950.7	5168	--	--	--	13970.7
	AE+β21+β31	9	13952.3	5169	1.51982	1	0.217647	13970.3
	CE+β21+β31	9	13994.2	5169	43.4708	1	4.30328e-11	14012.2
	E+β21+β31	8	14224.5	5170	273.715	2	3.66114e-60	14240.5
Putamen
	ACE+β21+β31	10	13504.4	5168	--	--	--	13524.4
	AE+β21+β31	9	13504.4	5169	0.00521461	1	0.942433	13522.4
	CE+β21+β31	9	13734.2	5169	229.783	1	6.64754e-52	13752.2
	E+β21+β31	8	14102.3	5170	597.933	2	1.4473e-130	14118.3
Note: ep = number of estimated parameters, -2LL = -2 x log-likelihood, Δ-2LL = change in -2 x log-likelihood, Δdf = change in degrees of freedom, AIC = Akaike Information Criteria, β21=ROI PRS, β31= CUD PRS

[truncated: 11 more sheets: S10, S11, S12, S13, S14, S15, S16, S17, S18, S19, S20]
